# Supplementary material
Source: publisher figshare collection journal article supplement (https://acs.figshare.com/ndownloader/files/4586296)
Supplement: Supplementary file 1 [file 4586296]

data_688505
 
_audit_creation_method            SHELXL-97 
_chemical_name_systematic 
; 
 ? 
; 
_chemical_name_common             ? 
_chemical_melting_point           ? 
_chemical_formula_moiety         'C10 H20 O4' 
_chemical_formula_sum            'C10 H20 O4' 
_chemical_formula_weight          204.26 
 
loop_ 
 _atom_type_symbol 
 _atom_type_description 
 _atom_type_scat_dispersion_real 
 _atom_type_scat_dispersion_imag 
 _atom_type_scat_source 
 'C'  'C'   0.0033   0.0016 
 'International Tables Vol C Tables 4.2.6.8 and 6.1.1.4' 
 'H'  'H'   0.0000   0.0000 
 'International Tables Vol C Tables 4.2.6.8 and 6.1.1.4' 
 'O'  'O'   0.0106   0.0060 
 'International Tables Vol C Tables 4.2.6.8 and 6.1.1.4' 
 
_symmetry_cell_setting            monoclinic 
_symmetry_space_group_name_H-M    'P 21'
_symmetry_space_group_name_Hall   'P 2yb  '  
 
loop_ 
 _symmetry_equiv_pos_as_xyz 
 'x, y, z' 
 '-x, y+1/2, -z' 
 
_cell_length_a                    6.600(3) 
_cell_length_b                    9.507(4) 
_cell_length_c                    17.683(7) 
_cell_angle_alpha                 90 
_cell_angle_beta                  93.003(7) 
_cell_angle_gamma                 90 
_cell_volume                      1108.0(7) 
_cell_formula_units_Z             4 
_cell_measurement_temperature     98(2) 
_cell_measurement_reflns_used     6754
_cell_measurement_theta_min       2.1
_cell_measurement_theta_max       40.6
 
_exptl_crystal_description       'Prism'
_exptl_crystal_colour            'Colourless'
_exptl_crystal_size_max           0.30
_exptl_crystal_size_mid           0.15
_exptl_crystal_size_min           0.03
_exptl_crystal_density_meas       ? 
_exptl_crystal_density_diffrn     1.225 
_exptl_crystal_density_method     'not measured' 
_exptl_crystal_F_000              448 
_exptl_absorpt_coefficient_mu     0.093 
_exptl_absorpt_correction_type    'multi-scan' 
_exptl_absorpt_correction_T_min   0.637 
_exptl_absorpt_correction_T_max   1 
_exptl_absorpt_process_details    'ABSCOR (Higashi, 1995)'
 
_exptl_special_details 
; 
 ? 
; 
 
_diffrn_ambient_temperature       98(2) 
_diffrn_radiation_type            MoK\a  
_diffrn_radiation_wavelength      0.71073 
_diffrn_radiation_source          'fine-focus sealed tube' 
_diffrn_radiation_monochromator   graphite 
_diffrn_measurement_device_type   'AFC12\K/SATURN724' 
_diffrn_measurement_method        \w 
_diffrn_detector_area_resol_mean  ? 
_diffrn_standards_number          0 
_diffrn_standards_interval_count  0 
_diffrn_standards_interval_time   ? 
_diffrn_standards_decay_%         '< 1'  
_diffrn_reflns_number             7694 
_diffrn_reflns_av_R_equivalents   0.032 
_diffrn_reflns_av_sigmaI/netI     0.048 
_diffrn_reflns_limit_h_min        -8 
_diffrn_reflns_limit_h_max        8 
_diffrn_reflns_limit_k_min        -11 
_diffrn_reflns_limit_k_max        12 
_diffrn_reflns_limit_l_min        -17 
_diffrn_reflns_limit_l_max        22 
_diffrn_reflns_theta_min          3.1 
_diffrn_reflns_theta_max          27.5 
_reflns_number_total              4174 
_reflns_number_gt                 3928 
_reflns_threshold_expression      'I>2\s(I)' 
 
_computing_data_collection        
'CrystalClear (Rigaku Americas Corporation, 2005)'
_computing_cell_refinement        'CrystalClear'
_computing_data_reduction         'CrystalClear' 
_computing_structure_solution     'SIR-92 (Altomare et al., 1994)' 
_computing_structure_refinement   'SHELXL97 (Sheldrick, 2008)' 
_computing_molecular_graphics
'ORTEPII (Johnson, 1976) & Brandenburg (Crystal Impact, 2006)'  
_computing_publication_material   'SHELXL97' 
 
_refine_special_details 
; 
 Refinement of F^2^ against ALL reflections.  The weighted R-factor wR and 
 goodness of fit S are based on F^2^, conventional R-factors R are based 
 on F, with F set to zero for negative F^2^. The threshold expression of 
 F^2^ > 2sigma(F^2^) is used only for calculating R-factors(gt) etc. and is 
 not relevant to the choice of reflections for refinement.  R-factors based 
 on F^2^ are statistically about twice as large as those based on F, and R- 
 factors based on ALL data will be even larger.

 The structure was refined as a racemic twin. 
; 
 
_chemical_absolute_configuration  unk
_refine_ls_structure_factor_coef  Fsqd  
_refine_ls_matrix_type            full 
_refine_ls_weighting_scheme       calc  
_refine_ls_weighting_details 
 'calc w=1/[\s^2^(Fo^2^)+(0.0383P)^2^+0.2356P] where P=(Fo^2^+2Fc^2^)/3' 
_atom_sites_solution_primary      direct 
_atom_sites_solution_secondary    difmap 
_atom_sites_solution_hydrogens    geom 
_refine_ls_hydrogen_treatment     constr 
_refine_ls_extinction_method      none 
_refine_ls_extinction_coef        ? 
_refine_ls_abs_structure_details  ?
_refine_ls_abs_structure_Flack    ?
_refine_ls_number_reflns          4174 
_refine_ls_number_parameters      278 
_refine_ls_number_restraints      9 
_refine_ls_R_factor_all           0.050 
_refine_ls_R_factor_gt            0.046 
_refine_ls_wR_factor_ref          0.099 
_refine_ls_wR_factor_gt           0.096 
_refine_ls_goodness_of_fit_ref    1.09 
_refine_ls_restrained_S_all       1.09 
_refine_ls_shift/su_max           0.001 
_refine_ls_shift/su_mean          0.000 
 
loop_ 
 _atom_site_label 
 _atom_site_type_symbol 
 _atom_site_fract_x 
 _atom_site_fract_y 
 _atom_site_fract_z 
 _atom_site_U_iso_or_equiv 
 _atom_site_adp_type 
 _atom_site_occupancy 
 _atom_site_symmetry_multiplicity 
 _atom_site_calc_flag 
 _atom_site_refinement_flags 
 _atom_site_disorder_assembly 
 _atom_site_disorder_group 
O1 O 0.5767(2) 0.06691(18) 0.65434(8) 0.0203(3) Uani 1 1 d D . . 
H1O H 0.5586 0.0212 0.6941 0.030 Uiso 1 1 d D . . 
O2 O 0.1865(2) 0.07587(17) 0.72262(8) 0.0187(3) Uani 1 1 d D . . 
H2O H 0.1081 0.0097 0.7095 0.028 Uiso 1 1 d D . . 
O3 O -0.0595(2) 0.03641(17) 0.59926(8) 0.0179(3) Uani 1 1 d D . . 
H3O H -0.1794 0.0424 0.6127 0.027 Uiso 1 1 d D . . 
O4 O 0.1172(2) 0.37614(17) 0.53434(8) 0.0220(3) Uani 1 1 d D . . 
H4O H 0.1047 0.4175 0.4924 0.033 Uiso 1 1 d D . . 
O5 O 0.3392(2) 0.11409(17) 0.87945(8) 0.0190(3) Uani 1 1 d D . . 
H5O H 0.3148 0.0837 0.8353 0.029 Uiso 1 1 d D . . 
O6 O 0.6211(2) -0.05883(15) 0.79442(8) 0.0187(3) Uani 1 1 d D . . 
H6O H 0.6130 -0.1431 0.8082 0.028 Uiso 1 1 d D . . 
O7 O 0.7852(2) -0.20109(17) 0.90963(8) 0.0188(3) Uani 1 1 d D . . 
H7O H 0.8594 -0.2446 0.9418 0.028 Uiso 1 1 d D . . 
O8 O 1.0189(2) 0.13324(17) 0.97757(8) 0.0167(3) Uani 1 1 d D . . 
H8O H 1.1107 0.1305 0.9464 0.025 Uiso 1 1 d D . . 
C1 C 0.3860(3) 0.0760(2) 0.61161(11) 0.0159(4) Uani 1 1 d . . . 
H1 H 0.3337 -0.0215 0.6025 0.019 Uiso 1 1 calc R . . 
C2 C 0.2293(3) 0.1578(2) 0.65593(10) 0.0146(4) Uani 1 1 d . . . 
C3 C 0.0323(3) 0.1734(2) 0.60605(11) 0.0157(4) Uani 1 1 d . . . 
H3 H -0.0619 0.2377 0.6320 0.019 Uiso 1 1 calc R . . 
C4 C 0.0642(3) 0.2308(2) 0.52622(11) 0.0171(4) Uani 1 1 d . . . 
H4 H -0.0673 0.2240 0.4956 0.021 Uiso 1 1 calc R . . 
C5 C 0.2269(3) 0.1471(2) 0.48516(10) 0.0164(4) Uani 1 1 d . . . 
H5 H 0.1768 0.0482 0.4794 0.020 Uiso 1 1 calc R . . 
C6 C 0.4237(3) 0.1427(3) 0.53534(11) 0.0172(4) Uani 1 1 d . . . 
H6A H 0.5274 0.0876 0.5097 0.021 Uiso 1 1 calc R . . 
H6B H 0.4761 0.2394 0.5432 0.021 Uiso 1 1 calc R . . 
C7 C 0.3053(3) 0.3004(3) 0.68508(12) 0.0210(4) Uani 1 1 d . . . 
H7A H 0.4317 0.2876 0.7159 0.031 Uiso 1 1 calc R . . 
H7B H 0.2028 0.3432 0.7160 0.031 Uiso 1 1 calc R . . 
H7C H 0.3301 0.3619 0.6421 0.031 Uiso 1 1 calc R . . 
C8 C 0.2564(3) 0.2050(3) 0.40488(12) 0.0221(5) Uani 1 1 d . . . 
H8 H 0.3051 0.3044 0.4096 0.026 Uiso 1 1 calc R . . 
C9 C 0.0566(4) 0.2038(3) 0.35611(12) 0.0262(5) Uani 1 1 d . . . 
H9A H 0.0796 0.2439 0.3062 0.039 Uiso 1 1 calc R . . 
H9B H -0.0453 0.2600 0.3809 0.039 Uiso 1 1 calc R . . 
H9C H 0.0081 0.1069 0.3501 0.039 Uiso 1 1 calc R . . 
C10 C 0.4146(4) 0.1194(4) 0.36372(13) 0.0392(7) Uani 1 1 d . . . 
H10A H 0.4334 0.1610 0.3139 0.059 Uiso 1 1 calc R . . 
H10B H 0.3675 0.0222 0.3575 0.059 Uiso 1 1 calc R . . 
H10C H 0.5440 0.1205 0.3936 0.059 Uiso 1 1 calc R . . 
C11 C 0.5037(3) 0.0314(2) 0.91337(11) 0.0163(4) Uani 1 1 d . . . 
H11 H 0.4525 -0.0658 0.9225 0.020 Uiso 1 1 calc R . . 
C12 C 0.6837(3) 0.0215(2) 0.86148(11) 0.0149(4) Uani 1 1 d . . . 
C13 C 0.8571(3) -0.0597(2) 0.90363(11) 0.0146(4) Uani 1 1 d . . . 
H13 H 0.9783 -0.0592 0.8720 0.017 Uiso 1 1 calc R . . 
C14 C 0.9192(3) -0.0014(2) 0.98266(11) 0.0139(4) Uani 1 1 d . . . 
H14 H 1.0166 -0.0689 1.0082 0.017 Uiso 1 1 calc R . . 
C15 C 0.7358(3) 0.0146(2) 1.03215(11) 0.0148(4) Uani 1 1 d . . . 
H15 H 0.6821 -0.0821 1.0408 0.018 Uiso 1 1 calc R . . 
C16 C 0.5657(3) 0.0978(3) 0.98974(11) 0.0177(4) Uani 1 1 d . . . 
H16A H 0.4461 0.1018 1.0212 0.021 Uiso 1 1 calc R . . 
H16B H 0.6121 0.1953 0.9816 0.021 Uiso 1 1 calc R . . 
C17 C 0.7515(3) 0.1643(2) 0.83304(12) 0.0170(4) Uani 1 1 d . . . 
H17A H 0.8657 0.1517 0.8005 0.025 Uiso 1 1 calc R . . 
H17B H 0.7937 0.2238 0.8763 0.025 Uiso 1 1 calc R . . 
H17C H 0.6386 0.2093 0.8041 0.025 Uiso 1 1 calc R . . 
C18 C 0.7932(3) 0.0776(3) 1.11079(11) 0.0178(4) Uani 1 1 d . . . 
H18 H 0.8324 0.1782 1.1038 0.021 Uiso 1 1 calc R . . 
C19 C 0.9740(3) 0.0003(3) 1.15007(12) 0.0216(5) Uani 1 1 d . . . 
H19A H 1.0911 0.0058 1.1183 0.032 Uiso 1 1 calc R . . 
H19B H 0.9381 -0.0985 1.1578 0.032 Uiso 1 1 calc R . . 
H19C H 1.0082 0.0445 1.1992 0.032 Uiso 1 1 calc R . . 
C20 C 0.6124(3) 0.0732(3) 1.16224(12) 0.0250(5) Uani 1 1 d . . . 
H20A H 0.4977 0.1247 1.1381 0.038 Uiso 1 1 calc R . . 
H20B H 0.6513 0.1169 1.2110 0.038 Uiso 1 1 calc R . . 
H20C H 0.5728 -0.0248 1.1704 0.038 Uiso 1 1 calc R . . 
 
loop_ 
 _atom_site_aniso_label 
 _atom_site_aniso_U_11 
 _atom_site_aniso_U_22 
 _atom_site_aniso_U_33 
 _atom_site_aniso_U_23 
 _atom_site_aniso_U_13 
 _atom_site_aniso_U_12 
O1 0.0120(7) 0.0291(10) 0.0198(7) 0.0048(7) 0.0013(5) 0.0009(6) 
O2 0.0183(7) 0.0206(9) 0.0175(7) 0.0010(6) 0.0023(5) -0.0019(6) 
O3 0.0121(7) 0.0188(8) 0.0230(7) -0.0034(6) 0.0038(5) -0.0031(6) 
O4 0.0318(9) 0.0150(9) 0.0191(7) 0.0020(6) 0.0010(6) 0.0044(7) 
O5 0.0136(7) 0.0250(9) 0.0182(7) 0.0010(6) -0.0008(5) 0.0042(6) 
O6 0.0228(8) 0.0148(8) 0.0184(7) -0.0017(6) -0.0017(6) -0.0010(6) 
O7 0.0201(8) 0.0102(8) 0.0255(8) 0.0020(6) -0.0036(6) -0.0006(6) 
O8 0.0139(7) 0.0163(8) 0.0200(7) -0.0023(6) 0.0021(5) -0.0032(6) 
C1 0.0136(9) 0.0153(10) 0.0190(9) 0.0022(8) 0.0020(7) 0.0000(8) 
C2 0.0169(10) 0.0135(11) 0.0134(9) 0.0020(8) 0.0015(7) -0.0010(8) 
C3 0.0133(9) 0.0144(11) 0.0196(9) -0.0017(8) 0.0022(7) 0.0003(7) 
C4 0.0152(10) 0.0178(11) 0.0183(10) 0.0008(8) -0.0006(8) 0.0029(8) 
C5 0.0158(9) 0.0174(11) 0.0159(9) 0.0000(8) 0.0010(7) 0.0026(8) 
C6 0.0136(9) 0.0208(11) 0.0173(9) 0.0023(9) 0.0022(7) 0.0009(8) 
C7 0.0229(11) 0.0168(11) 0.0229(10) -0.0029(9) -0.0021(8) -0.0016(9) 
C8 0.0225(11) 0.0253(13) 0.0187(10) 0.0028(9) 0.0037(8) 0.0050(9) 
C9 0.0334(13) 0.0281(14) 0.0169(10) 0.0008(9) -0.0011(9) 0.0018(10) 
C10 0.0436(15) 0.056(2) 0.0189(11) 0.0058(12) 0.0121(10) 0.0217(14) 
C11 0.0133(9) 0.0173(11) 0.0181(9) 0.0018(8) -0.0013(7) -0.0009(8) 
C12 0.0137(9) 0.0146(10) 0.0162(9) -0.0005(8) -0.0008(7) 0.0011(8) 
C13 0.0146(10) 0.0119(10) 0.0173(9) -0.0024(8) 0.0015(7) 0.0004(8) 
C14 0.0119(9) 0.0128(10) 0.0169(9) 0.0004(8) -0.0011(7) -0.0002(7) 
C15 0.0121(9) 0.0168(10) 0.0156(9) -0.0005(8) 0.0017(7) 0.0004(8) 
C16 0.0137(9) 0.0225(12) 0.0172(9) 0.0004(8) 0.0030(7) 0.0029(8) 
C17 0.0150(9) 0.0142(11) 0.0217(10) 0.0023(8) 0.0014(7) -0.0018(7) 
C18 0.0187(10) 0.0190(11) 0.0158(9) -0.0012(8) 0.0017(7) 0.0024(8) 
C19 0.0214(11) 0.0254(13) 0.0177(10) -0.0013(9) -0.0017(8) 0.0045(9) 
C20 0.0258(11) 0.0349(14) 0.0149(9) 0.0035(10) 0.0053(8) 0.0087(10) 
 
_geom_special_details 
; 
 All esds (except the esd in the dihedral angle between two l.s. planes) 
 are estimated using the full covariance matrix.  The cell esds are taken 
 into account individually in the estimation of esds in distances, angles 
 and torsion angles; correlations between esds in cell parameters are only 
 used when they are defined by crystal symmetry.  An approximate (isotropic) 
 treatment of cell esds is used for estimating esds involving l.s. planes. 
; 
 
loop_ 
 _geom_bond_atom_site_label_1 
 _geom_bond_atom_site_label_2 
 _geom_bond_distance 
 _geom_bond_site_symmetry_2 
 _geom_bond_publ_flag 
O1 C1 1.436(2) . ? 
O1 H1O 0.8400 . ? 
O2 C2 1.454(2) . ? 
O2 H2O 0.8400 . ? 
O3 C3 1.439(3) . ? 
O3 H3O 0.8400 . ? 
O4 C4 1.431(3) . ? 
O4 H4O 0.8400 . ? 
O5 C11 1.445(2) . ? 
O5 H5O 0.8400 . ? 
O6 C12 1.452(2) . ? 
O6 H6O 0.8400 . ? 
O7 C13 1.432(3) . ? 
O7 H7O 0.8400 . ? 
O8 C14 1.444(2) . ? 
O8 H8O 0.8400 . ? 
C1 C6 1.522(3) . ? 
C1 C2 1.541(3) . ? 
C1 H1 1.0000 . ? 
C2 C7 1.525(3) . ? 
C2 C3 1.540(3) . ? 
C3 C4 1.538(3) . ? 
C3 H3 1.0000 . ? 
C4 C5 1.547(3) . ? 
C4 H4 1.0000 . ? 
C5 C6 1.535(3) . ? 
C5 C8 1.544(3) . ? 
C5 H5 1.0000 . ? 
C6 H6A 0.9900 . ? 
C6 H6B 0.9900 . ? 
C7 H7A 0.9800 . ? 
C7 H7B 0.9800 . ? 
C7 H7C 0.9800 . ? 
C8 C9 1.537(3) . ? 
C8 C10 1.537(3) . ? 
C8 H8 1.0000 . ? 
C9 H9A 0.9800 . ? 
C9 H9B 0.9800 . ? 
C9 H9C 0.9800 . ? 
C10 H10A 0.9800 . ? 
C10 H10B 0.9800 . ? 
C10 H10C 0.9800 . ? 
C11 C16 1.527(3) . ? 
C11 C12 1.541(3) . ? 
C11 H11 1.0000 . ? 
C12 C17 1.523(3) . ? 
C12 C13 1.540(3) . ? 
C13 C14 1.539(3) . ? 
C13 H13 1.0000 . ? 
C14 C15 1.538(3) . ? 
C14 H14 1.0000 . ? 
C15 C16 1.536(3) . ? 
C15 C18 1.543(3) . ? 
C15 H15 1.0000 . ? 
C16 H16A 0.9900 . ? 
C16 H16B 0.9900 . ? 
C17 H17A 0.9800 . ? 
C17 H17B 0.9800 . ? 
C17 H17C 0.9800 . ? 
C18 C19 1.536(3) . ? 
C18 C20 1.539(3) . ? 
C18 H18 1.0000 . ? 
C19 H19A 0.9800 . ? 
C19 H19B 0.9800 . ? 
C19 H19C 0.9800 . ? 
C20 H20A 0.9800 . ? 
C20 H20B 0.9800 . ? 
C20 H20C 0.9800 . ? 
 
loop_ 
 _geom_angle_atom_site_label_1 
 _geom_angle_atom_site_label_2 
 _geom_angle_atom_site_label_3 
 _geom_angle 
 _geom_angle_site_symmetry_1 
 _geom_angle_site_symmetry_3 
 _geom_angle_publ_flag 
C1 O1 H1O 108.2 . . ? 
C2 O2 H2O 108.7 . . ? 
C3 O3 H3O 108.3 . . ? 
C4 O4 H4O 110.6 . . ? 
C11 O5 H5O 107.6 . . ? 
C12 O6 H6O 106.6 . . ? 
C13 O7 H7O 109.2 . . ? 
C14 O8 H8O 111.1 . . ? 
O1 C1 C6 108.18(15) . . ? 
O1 C1 C2 110.86(16) . . ? 
C6 C1 C2 112.69(17) . . ? 
O1 C1 H1 108.3 . . ? 
C6 C1 H1 108.3 . . ? 
C2 C1 H1 108.3 . . ? 
O2 C2 C7 106.05(15) . . ? 
O2 C2 C3 108.79(15) . . ? 
C7 C2 C3 111.17(18) . . ? 
O2 C2 C1 107.84(17) . . ? 
C7 C2 C1 113.76(17) . . ? 
C3 C2 C1 109.05(16) . . ? 
O3 C3 C4 108.78(16) . . ? 
O3 C3 C2 107.48(17) . . ? 
C4 C3 C2 114.06(16) . . ? 
O3 C3 H3 108.8 . . ? 
C4 C3 H3 108.8 . . ? 
C2 C3 H3 108.8 . . ? 
O4 C4 C3 107.16(17) . . ? 
O4 C4 C5 111.80(17) . . ? 
C3 C4 C5 112.34(17) . . ? 
O4 C4 H4 108.5 . . ? 
C3 C4 H4 108.5 . . ? 
C5 C4 H4 108.5 . . ? 
C6 C5 C8 113.43(17) . . ? 
C6 C5 C4 109.27(16) . . ? 
C8 C5 C4 111.86(18) . . ? 
C6 C5 H5 107.3 . . ? 
C8 C5 H5 107.3 . . ? 
C4 C5 H5 107.3 . . ? 
C1 C6 C5 110.55(16) . . ? 
C1 C6 H6A 109.5 . . ? 
C5 C6 H6A 109.5 . . ? 
C1 C6 H6B 109.5 . . ? 
C5 C6 H6B 109.5 . . ? 
H6A C6 H6B 108.1 . . ? 
C2 C7 H7A 109.5 . . ? 
C2 C7 H7B 109.5 . . ? 
H7A C7 H7B 109.5 . . ? 
C2 C7 H7C 109.5 . . ? 
H7A C7 H7C 109.5 . . ? 
H7B C7 H7C 109.5 . . ? 
C9 C8 C10 108.3(2) . . ? 
C9 C8 C5 111.56(18) . . ? 
C10 C8 C5 111.61(19) . . ? 
C9 C8 H8 108.4 . . ? 
C10 C8 H8 108.4 . . ? 
C5 C8 H8 108.4 . . ? 
C8 C9 H9A 109.5 . . ? 
C8 C9 H9B 109.5 . . ? 
H9A C9 H9B 109.5 . . ? 
C8 C9 H9C 109.5 . . ? 
H9A C9 H9C 109.5 . . ? 
H9B C9 H9C 109.5 . . ? 
C8 C10 H10A 109.5 . . ? 
C8 C10 H10B 109.5 . . ? 
H10A C10 H10B 109.5 . . ? 
C8 C10 H10C 109.5 . . ? 
H10A C10 H10C 109.5 . . ? 
H10B C10 H10C 109.5 . . ? 
O5 C11 C16 107.64(17) . . ? 
O5 C11 C12 111.81(16) . . ? 
C16 C11 C12 111.89(16) . . ? 
O5 C11 H11 108.5 . . ? 
C16 C11 H11 108.5 . . ? 
C12 C11 H11 108.5 . . ? 
O6 C12 C17 105.96(16) . . ? 
O6 C12 C13 107.69(16) . . ? 
C17 C12 C13 112.49(17) . . ? 
O6 C12 C11 108.88(16) . . ? 
C17 C12 C11 113.01(17) . . ? 
C13 C12 C11 108.59(16) . . ? 
O7 C13 C14 110.15(16) . . ? 
O7 C13 C12 105.41(16) . . ? 
C14 C13 C12 114.51(17) . . ? 
O7 C13 H13 108.9 . . ? 
C14 C13 H13 108.9 . . ? 
C12 C13 H13 108.9 . . ? 
O8 C14 C15 108.83(16) . . ? 
O8 C14 C13 111.29(16) . . ? 
C15 C14 C13 111.86(16) . . ? 
O8 C14 H14 108.3 . . ? 
C15 C14 H14 108.3 . . ? 
C13 C14 H14 108.3 . . ? 
C16 C15 C14 110.49(16) . . ? 
C16 C15 C18 112.27(17) . . ? 
C14 C15 C18 112.83(16) . . ? 
C16 C15 H15 107.0 . . ? 
C14 C15 H15 107.0 . . ? 
C18 C15 H15 107.0 . . ? 
C11 C16 C15 111.98(17) . . ? 
C11 C16 H16A 109.2 . . ? 
C15 C16 H16A 109.2 . . ? 
C11 C16 H16B 109.2 . . ? 
C15 C16 H16B 109.2 . . ? 
H16A C16 H16B 107.9 . . ? 
C12 C17 H17A 109.5 . . ? 
C12 C17 H17B 109.5 . . ? 
H17A C17 H17B 109.5 . . ? 
C12 C17 H17C 109.5 . . ? 
H17A C17 H17C 109.5 . . ? 
H17B C17 H17C 109.5 . . ? 
C19 C18 C20 109.14(17) . . ? 
C19 C18 C15 111.73(18) . . ? 
C20 C18 C15 111.17(17) . . ? 
C19 C18 H18 108.2 . . ? 
C20 C18 H18 108.2 . . ? 
C15 C18 H18 108.2 . . ? 
C18 C19 H19A 109.5 . . ? 
C18 C19 H19B 109.5 . . ? 
H19A C19 H19B 109.5 . . ? 
C18 C19 H19C 109.5 . . ? 
H19A C19 H19C 109.5 . . ? 
H19B C19 H19C 109.5 . . ? 
C18 C20 H20A 109.5 . . ? 
C18 C20 H20B 109.5 . . ? 
H20A C20 H20B 109.5 . . ? 
C18 C20 H20C 109.5 . . ? 
H20A C20 H20C 109.5 . . ? 
H20B C20 H20C 109.5 . . ? 
 
loop_ 
 _geom_torsion_atom_site_label_1 
 _geom_torsion_atom_site_label_2 
 _geom_torsion_atom_site_label_3 
 _geom_torsion_atom_site_label_4 
 _geom_torsion 
 _geom_torsion_site_symmetry_1 
 _geom_torsion_site_symmetry_2 
 _geom_torsion_site_symmetry_3 
 _geom_torsion_site_symmetry_4 
 _geom_torsion_publ_flag 
O1 C1 C2 O2 -65.7(2) . . . . ? 
C6 C1 C2 O2 172.90(16) . . . . ? 
O1 C1 C2 C7 51.6(2) . . . . ? 
C6 C1 C2 C7 -69.8(2) . . . . ? 
O1 C1 C2 C3 176.34(16) . . . . ? 
C6 C1 C2 C3 54.9(2) . . . . ? 
O2 C2 C3 O3 -47.2(2) . . . . ? 
C7 C2 C3 O3 -163.64(15) . . . . ? 
C1 C2 C3 O3 70.14(19) . . . . ? 
O2 C2 C3 C4 -167.91(17) . . . . ? 
C7 C2 C3 C4 75.7(2) . . . . ? 
C1 C2 C3 C4 -50.5(2) . . . . ? 
O3 C3 C4 O4 168.76(15) . . . . ? 
C2 C3 C4 O4 -71.3(2) . . . . ? 
O3 C3 C4 C5 -68.1(2) . . . . ? 
C2 C3 C4 C5 51.9(2) . . . . ? 
O4 C4 C5 C6 66.5(2) . . . . ? 
C3 C4 C5 C6 -54.0(2) . . . . ? 
O4 C4 C5 C8 -59.9(2) . . . . ? 
C3 C4 C5 C8 179.56(18) . . . . ? 
O1 C1 C6 C5 176.60(18) . . . . ? 
C2 C1 C6 C5 -60.5(2) . . . . ? 
C8 C5 C6 C1 -176.37(18) . . . . ? 
C4 C5 C6 C1 58.1(2) . . . . ? 
C6 C5 C8 C9 178.5(2) . . . . ? 
C4 C5 C8 C9 -57.4(3) . . . . ? 
C6 C5 C8 C10 57.1(3) . . . . ? 
C4 C5 C8 C10 -178.7(2) . . . . ? 
O5 C11 C12 O6 -66.6(2) . . . . ? 
C16 C11 C12 O6 172.52(17) . . . . ? 
O5 C11 C12 C17 50.8(2) . . . . ? 
C16 C11 C12 C17 -70.0(2) . . . . ? 
O5 C11 C12 C13 176.36(17) . . . . ? 
C16 C11 C12 C13 55.5(2) . . . . ? 
O6 C12 C13 O7 -49.60(19) . . . . ? 
C17 C12 C13 O7 -165.99(15) . . . . ? 
C11 C12 C13 O7 68.15(19) . . . . ? 
O6 C12 C13 C14 -170.82(16) . . . . ? 
C17 C12 C13 C14 72.8(2) . . . . ? 
C11 C12 C13 C14 -53.1(2) . . . . ? 
O7 C13 C14 O8 171.80(14) . . . . ? 
C12 C13 C14 O8 -69.6(2) . . . . ? 
O7 C13 C14 C15 -66.2(2) . . . . ? 
C12 C13 C14 C15 52.4(2) . . . . ? 
O8 C14 C15 C16 71.9(2) . . . . ? 
C13 C14 C15 C16 -51.5(2) . . . . ? 
O8 C14 C15 C18 -54.7(2) . . . . ? 
C13 C14 C15 C18 -178.08(18) . . . . ? 
O5 C11 C16 C15 178.05(16) . . . . ? 
C12 C11 C16 C15 -58.7(2) . . . . ? 
C14 C15 C16 C11 55.4(2) . . . . ? 
C18 C15 C16 C11 -177.66(17) . . . . ? 
C16 C15 C18 C19 -175.71(18) . . . . ? 
C14 C15 C18 C19 -50.1(2) . . . . ? 
C16 C15 C18 C20 62.1(2) . . . . ? 
C14 C15 C18 C20 -172.27(18) . . . . ? 

loop_
    _geom_hbond_atom_site_label_D
    _geom_hbond_atom_site_label_H
    _geom_hbond_atom_site_label_A
    _geom_hbond_site_symmetry_A
    _geom_hbond_distance_DH
    _geom_hbond_distance_HA
    _geom_hbond_distance_DA
    _geom_hbond_angle_DHA
    _geom_hbond_publ_flag
O1  H1o  O2   1_555         0.84       2.59   2.902(2)        104 y
O1  H1o  O6   1_555         0.84       1.95   2.752(2)        158 y
O2  H2o  O3   1_555         0.84       2.21   2.677(2)        116 y
O3  H3o  O1   1_455         0.84       1.82   2.654(2)        172 y
O4  H4o  O3   2_556         0.84       1.99   2.820(2)        172 y
O5  H5o  O2   1_555         0.84       2.13   2.923(2)        159 y
O5  H5o  O6   1_555         0.84       2.57   2.953(2)        109 y
O6  H6o  O7   1_555         0.84       2.14   2.631(2)        117 y
O7  H7o  O8   2_747         0.84       1.98   2.804(2)        168 y
O8  H8o  O5   1_655         0.84       1.97   2.810(2)        175 y

_diffrn_measured_fraction_theta_max    0.997 
_diffrn_reflns_theta_full              27.5
_diffrn_measured_fraction_theta_full   0.997 
_refine_diff_density_max    0.24 
_refine_diff_density_min   -0.20
_refine_diff_density_rms    0.044 
